# Supplementary material
Source: Springer Nature journal article supplement (https://www.springermedizin.de/resource/supplementary/12879_2014_3503_MOESM2_ESM.pdf/9446226)
Supplement: MOESM2 [file 9446226]

**Identification**

Published reviews identified  
(n = 599)

- Database search (n = 589)
- Other sources (n = 10)

**Screening**

Reviews screened  
(n = 518)

Duplicates excluded  
(n = 81)

Reviews excluded  
(n = 449, including 25  
excluded due to language)

**Eligible**

Full-text reviews assessed  
for eligibility  
(n = 69)

Full-text articles excluded, with reasons  
(n = 63)

- 19 for non-relevant outcome
- 16 for being original studies
- 9 for non-relevant interventions
- 8 for not including appropriate studies
- 5 for being editorials or comments
- 4 for being qualitative studies/reports
- 1 for being a guidelines document
- 1 duplicate

**Included**

Reviews included in  
qualitative synthesis  
(n = 6)
